# Supplementary material for: Culicoides (Diptera: Ceratopogonidae) Abundance Is Influenced by Livestock Host Species and Distance to Hosts at the Micro Landscape Scale
Source: MDPI journal article supplement (doi:10.3390/insects14070637), 2023-07-14
Supplement: s1 [file s1]

Table S1. Generalized linear mixed (best fit) Poisson model fitted to quantify the mean number of female *Culicoides* sweep-netted in the neighborhood of different baits and by distance to baits.

| Variable                                                                        | Estimate  | std error | statistic | p-value | lower 95%<br>confidence limit<br>estimate | higher 95%<br>confidence limit<br>estimate |
|---------------------------------------------------------------------------------|-----------|-----------|-----------|---------|-------------------------------------------|--------------------------------------------|
| Intercept (cow)                                                                 | 6.143     | 0.204     | 30.044    | 0.000   | 5.742                                     | 6.544                                      |
| Sheep                                                                           | -2.580    | 0.208     | -12.382   | 0.000   | -2.988                                    | -2.171                                     |
| Light trap                                                                      | -4.052    | 0.227     | -17.885   | 0.000   | -4.496                                    | -3.608                                     |
| Natural splines at distance up to 10 m                                          | -4.237    | 0.384     | -11.037   | 0.000   | -4.989                                    | -3.485                                     |
| Natural splines at distance higher than 10 m                                    | -1.674    | 0.197     | -8.504    | 0.000   | -2.059                                    | -1.288                                     |
| Interaction between sheep and natural splines at distance up to 10 m            | 3.915     | 0.557     | 7.027     | 0.000   | 2.823                                     | 5.007                                      |
| Interaction between light trap and natural splines up to 10 m                   | 6.046     | 0.590     | 10.245    | 0.000   | 4.890                                     | 7.203                                      |
| Interaction between sheep and natural splines at distance higher than 10 m      | 1.028     | 0.284     | 3.618     | 0.000   | 0.471                                     | 1.586                                      |
| Interaction between light trap and natural splines at distance higher than 10 m | 2.473     | 0.285     | 8.673     | 0.000   | 1.914                                     | 3.032                                      |
| <i>Random Effects</i>                                                           |           |           |           |         |                                           |                                            |
| Observational effect (Sd) <sup>1</sup>                                          | 0.4926841 |           |           |         |                                           |                                            |
| day (Sd) <sup>2</sup>                                                           | 0.5061843 |           |           |         |                                           |                                            |

<sup>1</sup> daily sources of variation due to influence of weather (temperature and humidity) and daily repeated measures on the same baits

<sup>2</sup> daily varying overdispersion (observation effects) on the *Culicoides* distribution

Table S2. Generalized linear mixed (best fit) Poisson model fitted to quantify the rate of blood-fed female *Culicoides* sweep-netted in the neighborhood of different baits and by distance to baits.

| Variable                                     | Estimate   | std error | statistic | p-value | lower 95%<br>confidence<br>limit<br>estimate | higher 95%<br>confidence<br>limit<br>estimate |
|----------------------------------------------|------------|-----------|-----------|---------|----------------------------------------------|-----------------------------------------------|
| Intercept (cow)                              | -2.630     | 0.210     | -12.526   | 0.000   | -3.041                                       | -2.218                                        |
| Sheep                                        | -0.105     | 0.296     | -0.353    | 0.724   | -0.685                                       | 0.476                                         |
| Light trap                                   | 0.162      | 0.327     | 0.496     | 0.620   | -0.478                                       | 0.802                                         |
| Natural splines at distance up to 10 m       | -2.304     | 0.308     | -7.468    | 0.000   | -2.908                                       | -1.699                                        |
| Natural splines at distance higher than 10 m | -0.640     | 0.276     | -2.318    | 0.020   | -1.181                                       | -0.099                                        |
| <i>Random Effects</i>                        |            |           |           |         |                                              |                                               |
| Day <sup>1</sup>                             | 0.36975878 |           |           |         |                                              |                                               |
| Sampler <sup>2</sup>                         | 0.2452485  |           |           |         |                                              |                                               |

<sup>1</sup> daily sources of variation due to influence of weather (temperature and humidity) and daily repeated measures on the same baits

<sup>2</sup> Variation introduced by different people performing the catches
